# Supplementary material for: Tuning Anatase-Rutile Phase Transition Temperature: TiO2/SiO2 Nanoparticles Applied in Dye-Sensitized Solar Cells
Source: Hindawi journal article supplement (doi:10.1155/2019/7183978), 2019-03-13
Supplement: f1 [file 7183978.f1.pdf]

# Supplementary Materials

## Tuning anatase-rutile phase transition temperature: $\text{TiO}_2/\text{SiO}_2$ nanoparticles applied in Dye-sensitized solar cells

Billy N. Cardoso,<sup>1</sup> Emerson C. Kohlrausch,<sup>2</sup> Marina T. Laranjo,<sup>1</sup> Edilson V. Benvenutti,<sup>1</sup> Naira M. Balzaretto,<sup>3</sup> Leliz T. Arenas<sup>1</sup>, Marcos J. L. Santos<sup>2\*</sup>, Tania M. H. Costa<sup>1,3\*</sup>

<sup>1</sup> Laboratório de Sólidos e Superfícies, Instituto de Química, Universidade Federal do Rio Grande do Sul, 91501–970, Porto Alegre – RS, Brazil.

<sup>2</sup> Laboratório de Materiais Aplicados e Interfaces, Instituto de Química, Universidade Federal do Rio Grande do Sul, 91501–970, Porto Alegre – RS, Brazil.

<sup>3</sup> Laboratório de Altas Pressões e Materiais Avançados, Instituto de Física, Universidade Federal do Rio Grande do Sul, 91501–970, Porto Alegre – RS, Brazil.

Correspondence should be addressed to Tania M. H. Costa and Marcos J. Leite Santos; [taniaha@iq.ufrgs.br](mailto:taniaha@iq.ufrgs.br); [mjls@ufrgs.br](mailto:mjls@ufrgs.br)

### SEM

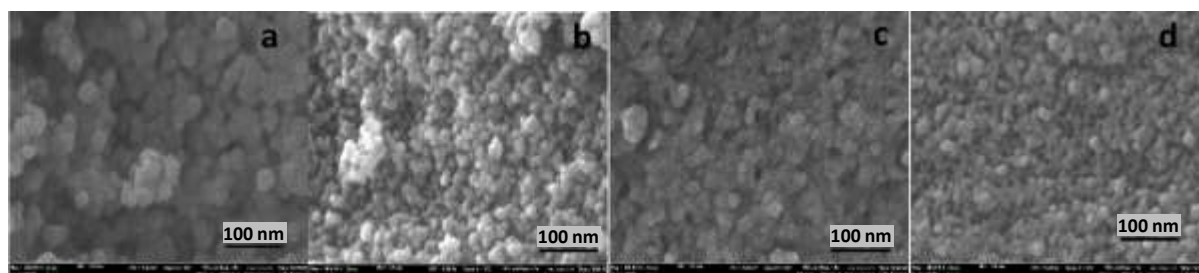

Figure S1: Scanning electron microscopy images of a) S0, b) S3, c) S5 and d) S10

Table S1: Carbon elemental analysis of the samples.

| Sample | Molar % Ti | Molar % Si |
|--------|------------|------------|
| S0     | $98 \pm 3$ | $2 \pm 1$  |
| S3     | $97 \pm 3$ | $3 \pm 1$  |
| S5     | $94 \pm 3$ | $6 \pm 2$  |
| S10    | $90 \pm 3$ | $10 \pm 2$ |

**XRD**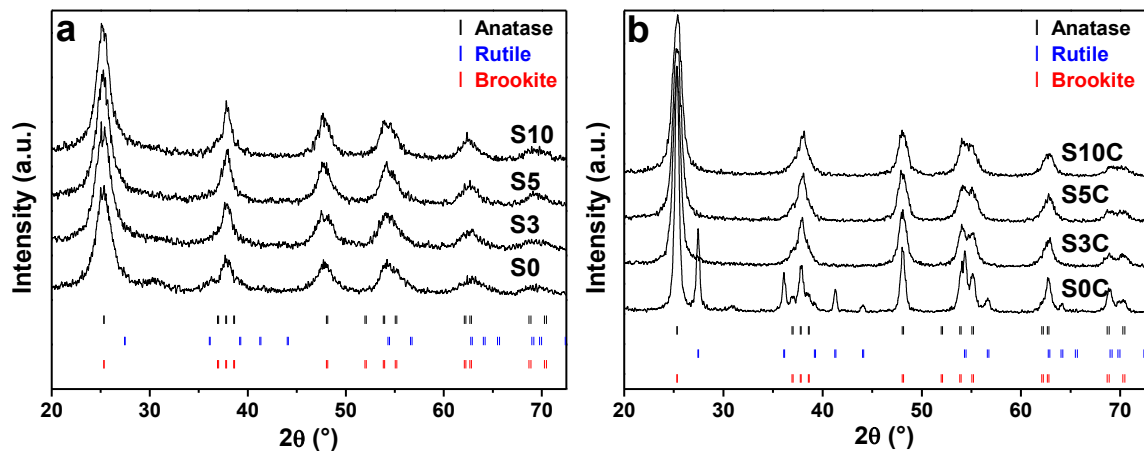

Figure S2: Diffraction patterns of the samples (a) before and (b) after thermal treatment at 500°C.

## Raman spectroscopy

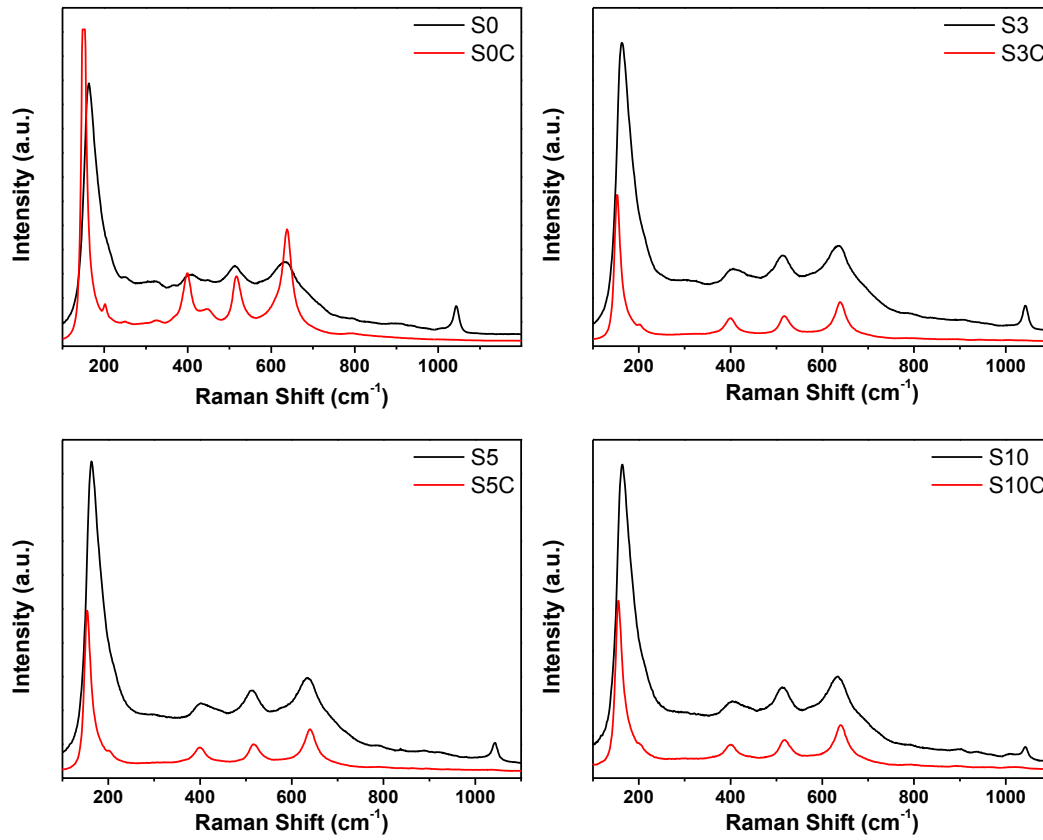

Figure S3: Raman Shift of S0, S3, S5 and S10 before and after thermal treatment.

## UV-Visible

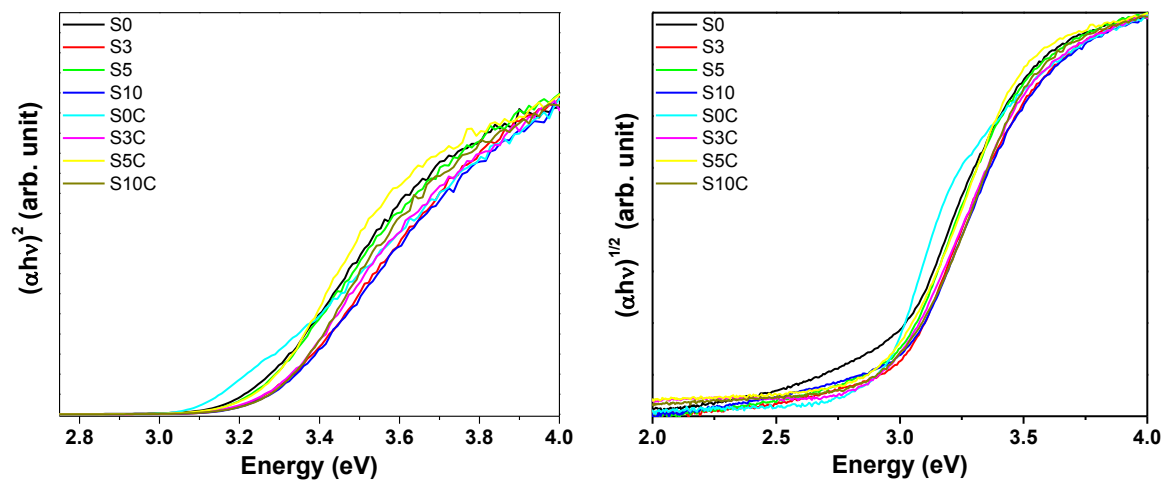

Figure S4: Direct (left) and indirect (right) Tauc Plot for S0, S3, S5 and S10.

Table S2: Direct and indirect band-gaps of the samples thermally treated at 500 °C.

| Sample | Direct band-gap [eV] | Indirect band-gap [eV] |
|--------|----------------------|------------------------|
| S0C    | 3.21                 | 2.95                   |
| S3C    | 3.26                 | 2.95                   |
| S5C    | 3.26                 | 2.95                   |
| S10C   | 3.29                 | 2.96                   |

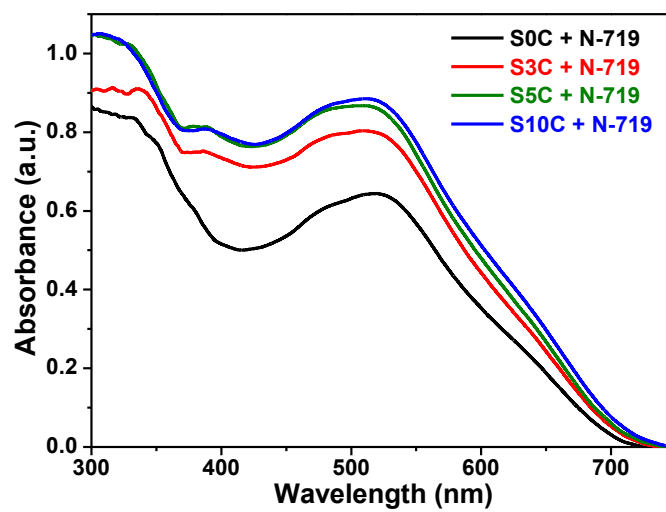

Figure S5: UV–Visible spectra of S0, S3, S5 and S10 thermally treated at 500 C and sensitized with N-719.
